# Supplementary material for: A dual non-covalent bonding constructed continuous interfacial structure for reducing interfacial thermal resistance
Source: Royal Society of Chemistry journal article supplement (doi:10.1039/d2ta02651a), 2022-01-01
Supplement: d2ta02651a1.pdf [file d2ta02651a1.pdf]

## Electronic Supplementary Information

### **Dual non-covalent bonding constructed continuous interfacial structure for reducing interfacial thermal resistance**

Bin Wu,<sup>‡,\*a</sup> Ya Li,<sup>‡,a</sup> Wei Chen,<sup>b</sup> Boyang Ding,<sup>a</sup> Peng Chen,<sup>a</sup> Ru Xia<sup>a</sup> and Jiasheng Qian<sup>\*a</sup>

<sup>a</sup>Key Laboratory of Environment-Friendly Polymeric Materials of Anhui Province, School of Chemistry & Chemical Engineering, Anhui University, Hefei, Anhui, 230601, China

<sup>b</sup>School of Materials and Chemical Engineering, Anhui Jianzhu University, Hefei, Anhui, 230009, China

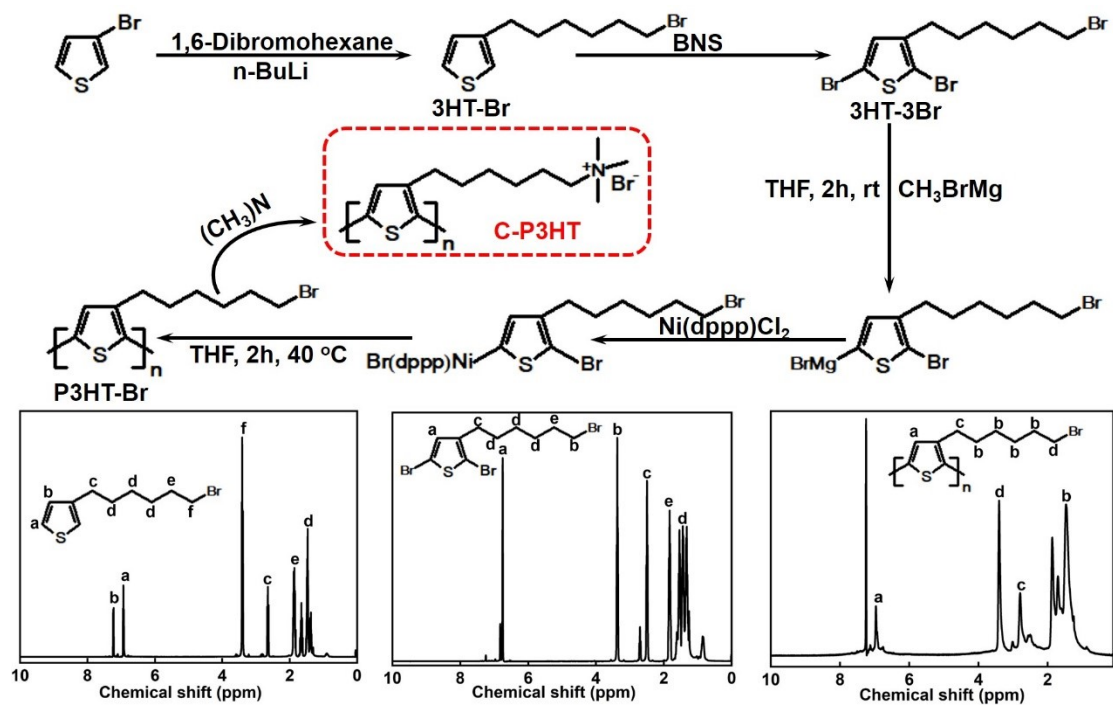

**Fig. S1** The flow-chart of preparation route of C-P3HT and corresponding  $^1\text{H}$  NMR spectrum.

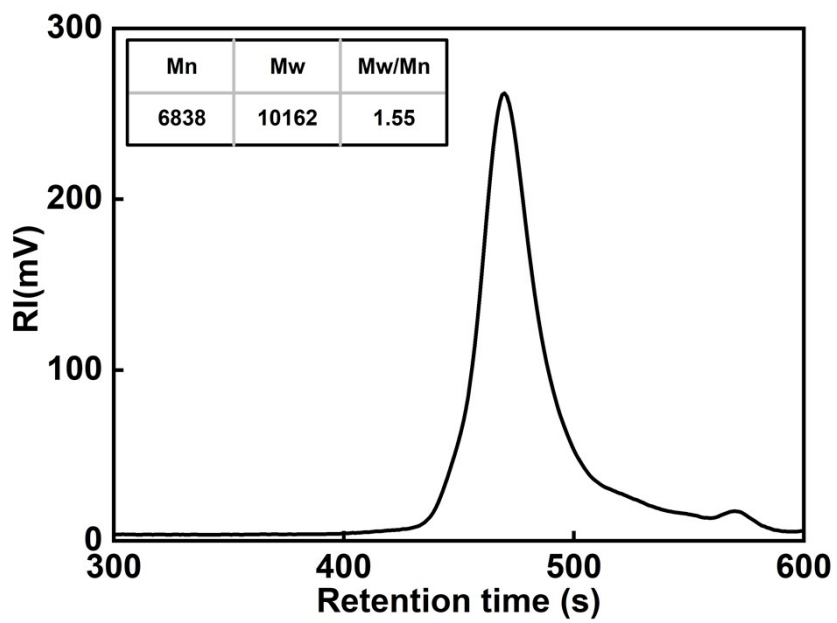

Fig. S2 GPC of P3HT-Br.

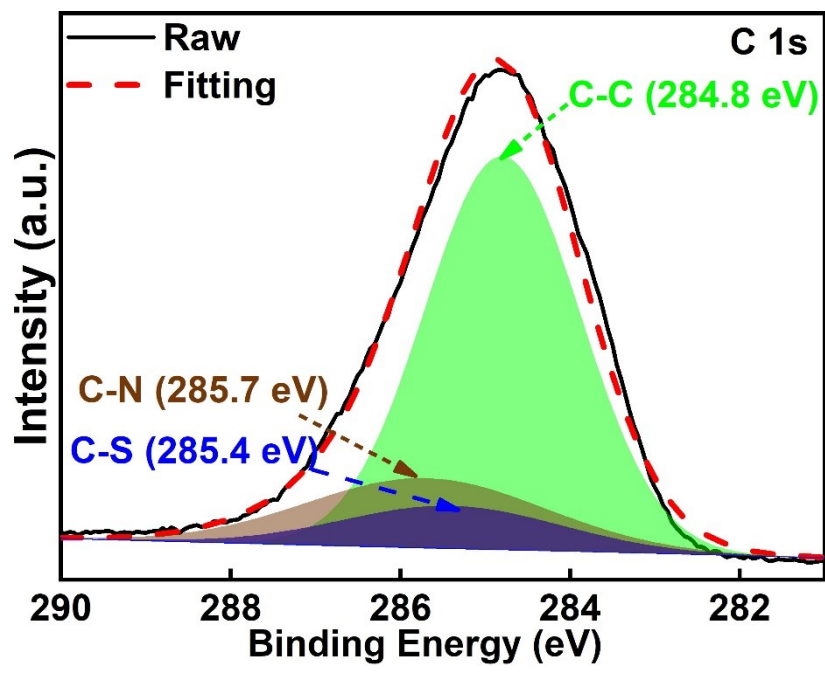

Fig. S3 XPS of C-P3HT.

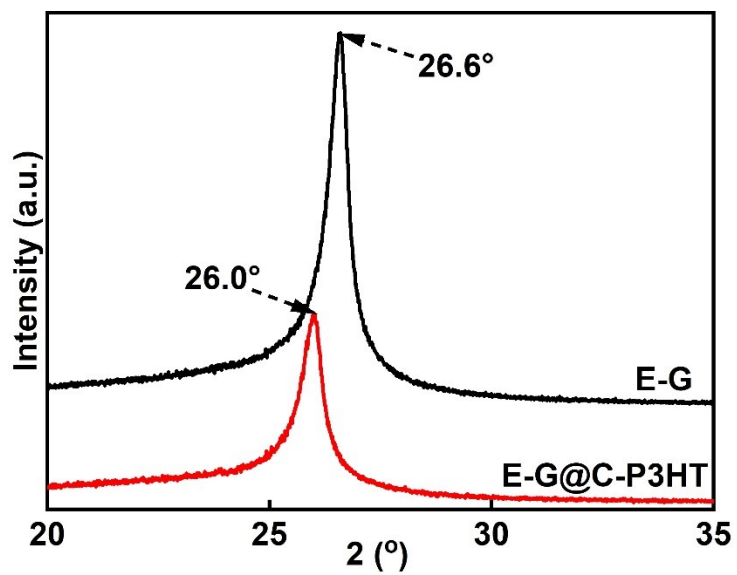

Fig. S4 The XRD of E-G and E-G@C-P3HT.

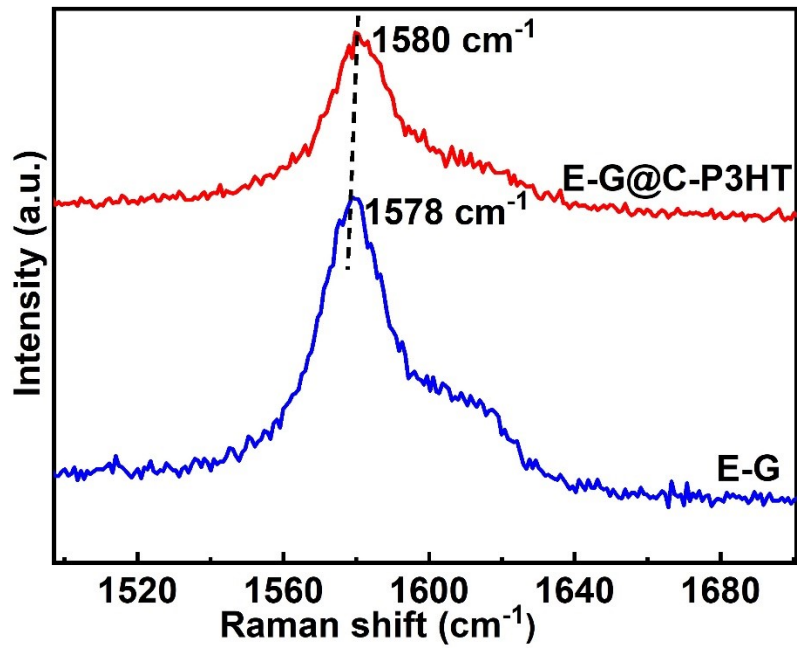

Fig. S5 Raman spectra of E-G and E-G@C-P3HT.

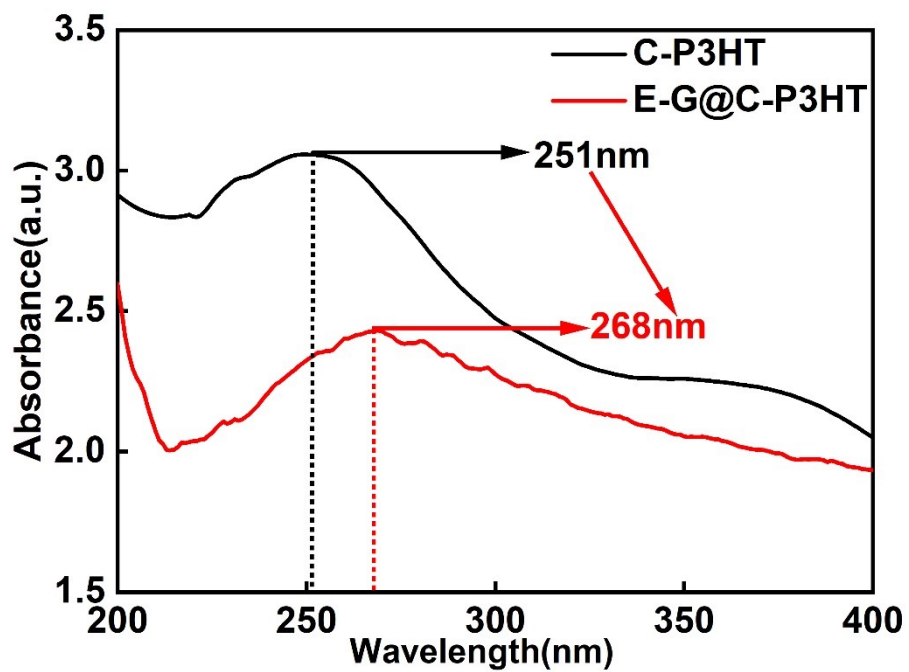

Fig. S6 UV/Vis absorption spectra of C-P3HT and E-G@ C-P3HT.

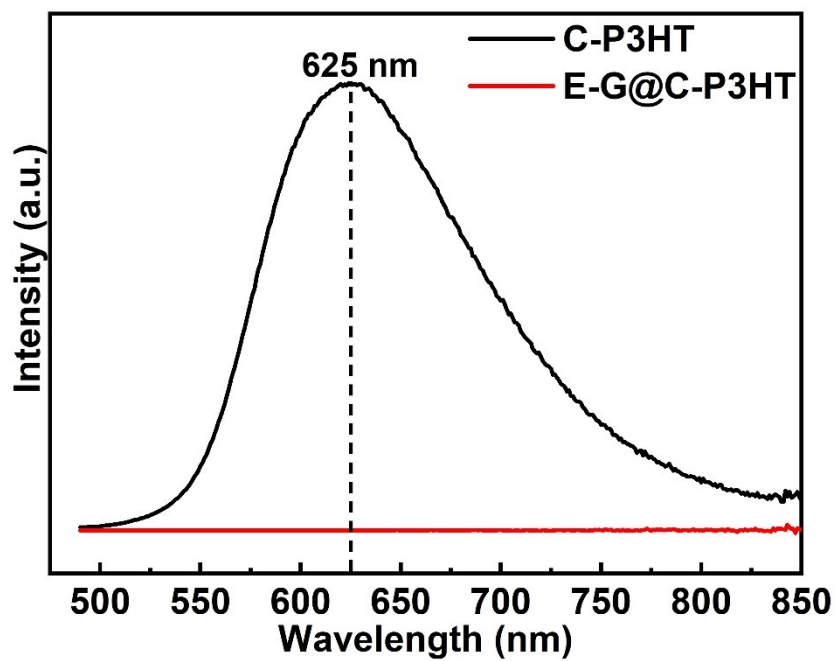

Fig. S7 Fluorescence spectra ( $\lambda=470$  nm) of C-P3HT (0.1 mg/mL) and E-G@ C-P3HT in water.



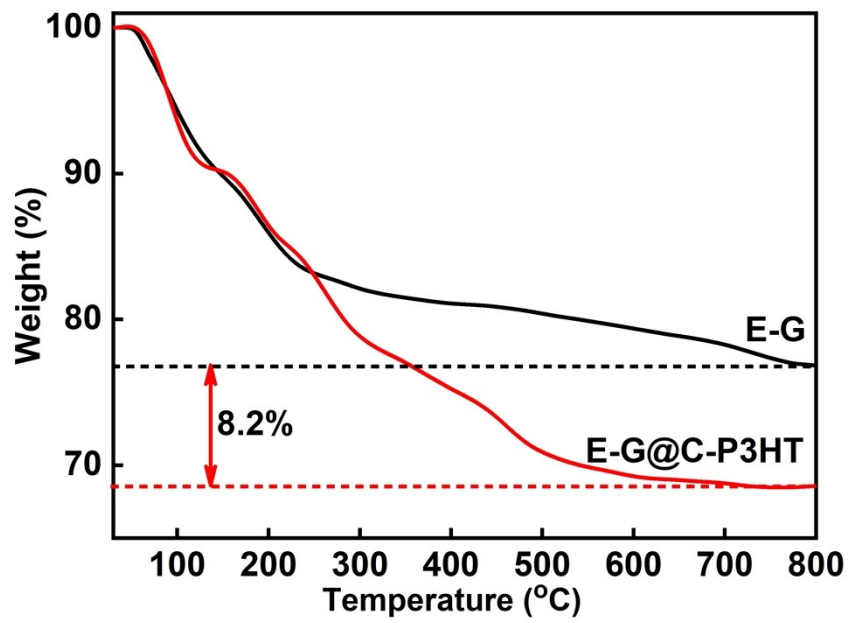

Fig.S8 TGA of E-G and E-G@CP3HT.

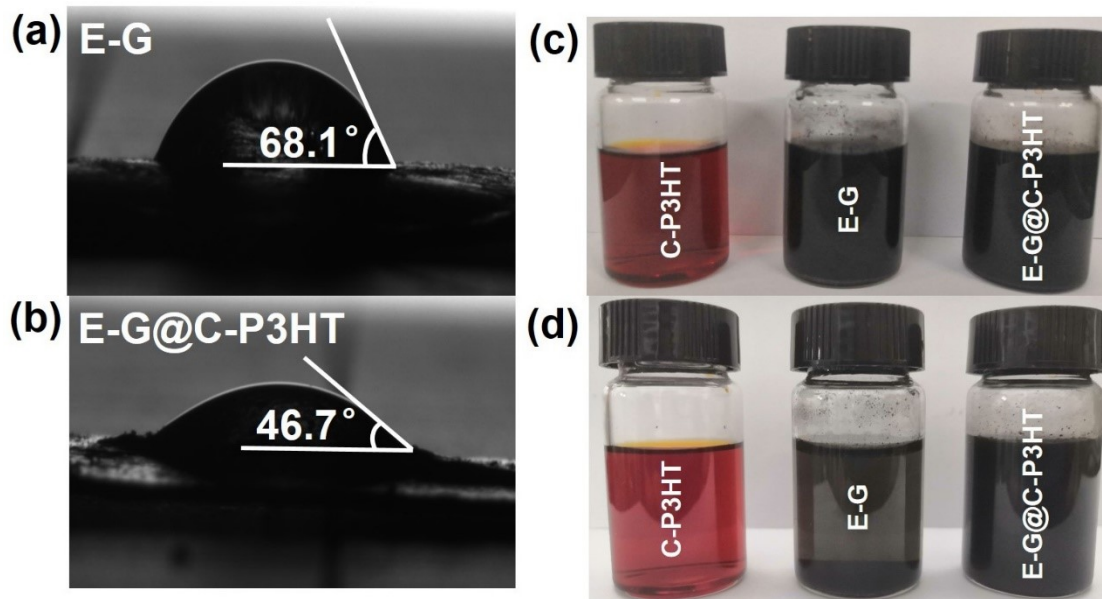

**Fig. S9** (a~b) Contact angle measurements of E-G and E-G@C-P3HT. Optical image of C-P3HT, E-G and E-G@C-P3HT in water (c) before and (d) after storage for 10 days.

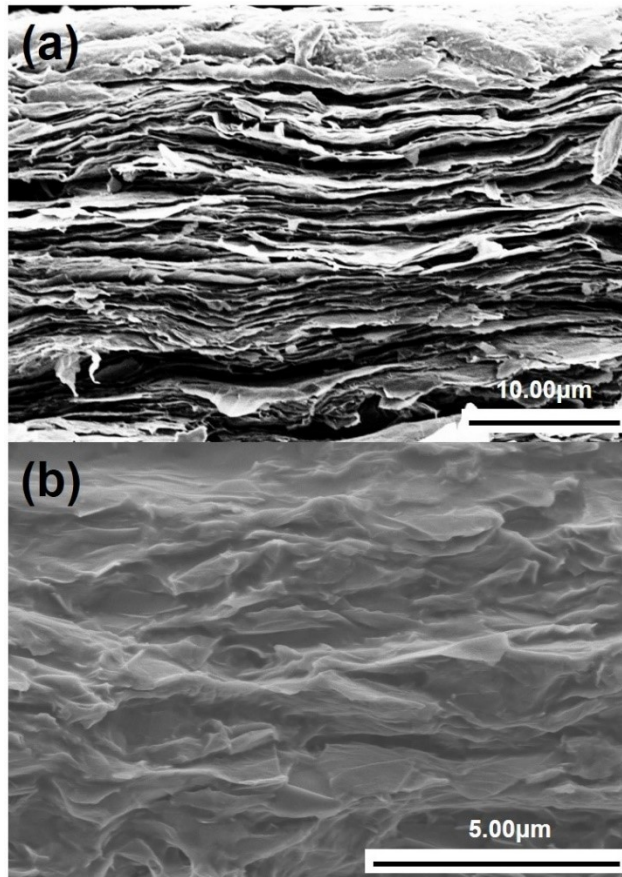

**Fig. S10** SEM cross-section images of (a) E-G/PVA and (b) E-G@C-P3HT/PVA with 15wt% filler loading.

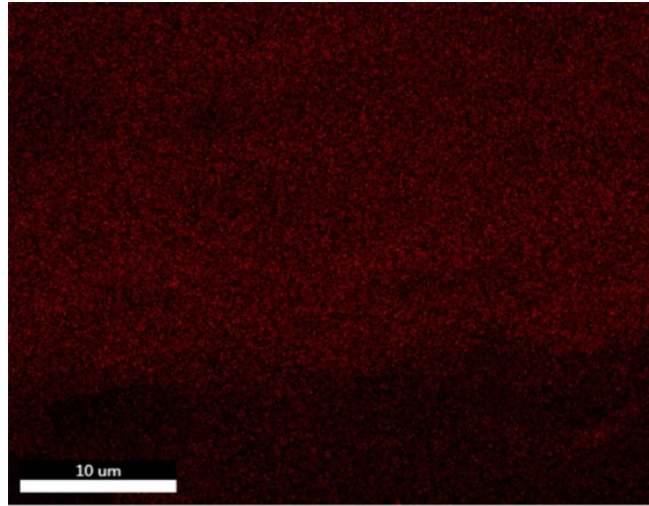

**Fig. S11** Sulfur elemental mapping image of E-G@C-P3HT.

As E-G was the main thermal conductivity filler, it is necessary to analyze the interface thermal resistance ( $R_i$ ) between E-G layers in detail before and after C-P3HT modification. The nonlinear model proposed by Foygel et al. to calculate the interfacial thermal resistance<sup>1-3</sup>. The model is given by the following equations.

$$\kappa_c - \kappa_m = \kappa_0 [(V_f - V_c)/(1 - V_c)]^\tau \quad (1)$$

where  $\kappa_c$  and  $\kappa_m$  are the thermal conductivity of the composites with different filler loading and PVA, respectively.  $\kappa_0$  is a pre-exponential factor ratio associated with contribution of filler.  $V_f$  is the volume fraction of fillers in composites.  $V_c$  is the key volume content of filler related to percolation threshold of thermal conductivity. As depicted in Fig. S12, the  $V_c$  values are 0.73 vol% and 0.75 vol% for the E-G/PVA and E-G@C-P3HT/PVA, respectively.  $\tau$  is a heat transfer exponent dependent on the aspect ratio of filler.

To calculate the  $R_i$  between filler, we have transformed the Foygel model formula as follows.

$$\kappa_c - \kappa_m = \kappa_0 [(V_f - V_c)/(1 - V_c)]^\tau \quad (2)$$

$$\lg(\kappa_c - \kappa_m) = \lg\{\kappa_0 [(V_f - V_c)/(1 - V_c)]^\tau\} \quad (3)$$

$$\lg(\kappa_c - \kappa_m) = \lg \kappa_0 + \tau \lg[(V_f - V_c)/(1 - V_c)] \quad (4)$$

The formula can be simplified as:

$$y = a + bx \quad (5)$$

where  $y$  equals to  $\lg(\kappa_c - \kappa_m)$ ,  $x$  equals to  $\lg[(V_f - V_c)/(1 - V_c)]$ ,  $a$  equals to  $\lg \kappa_0$  and  $b$  equals to  $\tau$ . As shown in Fig. S13, the slope and intercept of the fitted line correspond to  $\tau$  and  $\lg \kappa_0$ . And the calculated  $\kappa_0$  and  $\tau$  of E-G/PVA and E-G@C-P3HT/PVA were exhibited in Table. S1.

The contact resistance ( $R$ ) between E-G layers or between E-G@C-P3HT can be found according to the equation.

$$R = 1/(\kappa_0 L V_c^\tau) \quad (6)$$

where  $L$  is the sheet size of the filler. The distribution of E-G and E-G@C-P3HT sheet size were obtained by dynamic light scattering in Fig. S14. The mean sheet size of E-G and E-G@C-P3HT was 4150 and 4800 nm. The calculated  $R$  values are  $2.30 \times 10^5 \text{ K W}^{-1}$  and  $0.53 \times 10^5 \text{ K W}^{-1}$  for the E-G/PVA and E-G@C-P3HT/PVA, respectively.

The interface thermal resistance ( $R_i$ ) between E-G layers or between E-G@C-P3HT was obtained by following the equation.

$$R_i = R \times S_c \quad (7)$$

where  $S_c$  is the average overlap area between E-G or between E-G@C-P3HT. Considering the reassembly of E-G or E-G@C-P3HT during the vacuum-assisted filtration, it is more proper to calculate  $S_c$  using the size of 2D nanofillers in the composites. It can be assumed that 1/100 of each E-G or E-G@C-P3HT is involved in the heat conduction of network<sup>1</sup>. Therefore,  $S_c$  of E-G and E-G@C-P3HT was  $1.35 \times 10^{-13} \text{ m}^2$  and  $1.81 \times 10^{-13} \text{ m}^2$ , respectively.

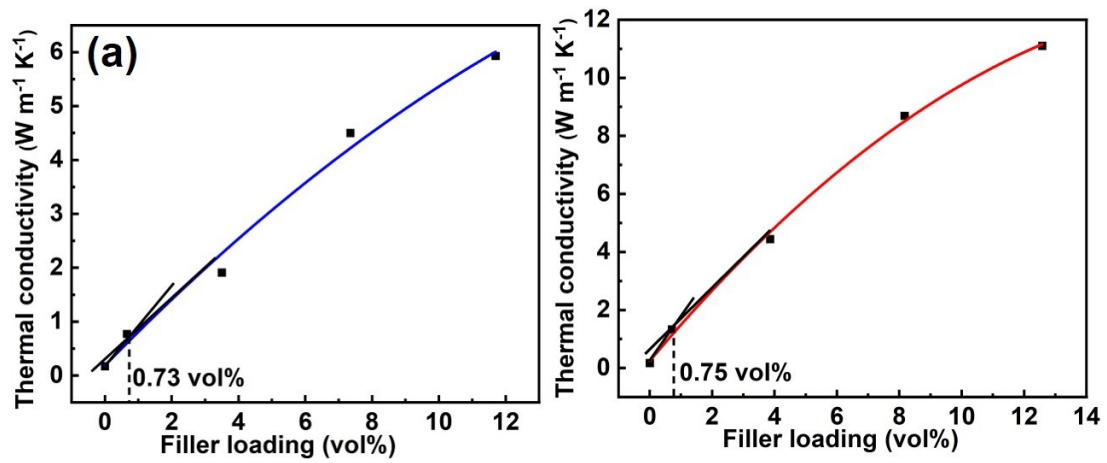

Fig. S12  $V_c$  achieved by tangential process of experimental data for (a) E-G and (b)E-G@C-P3HT.

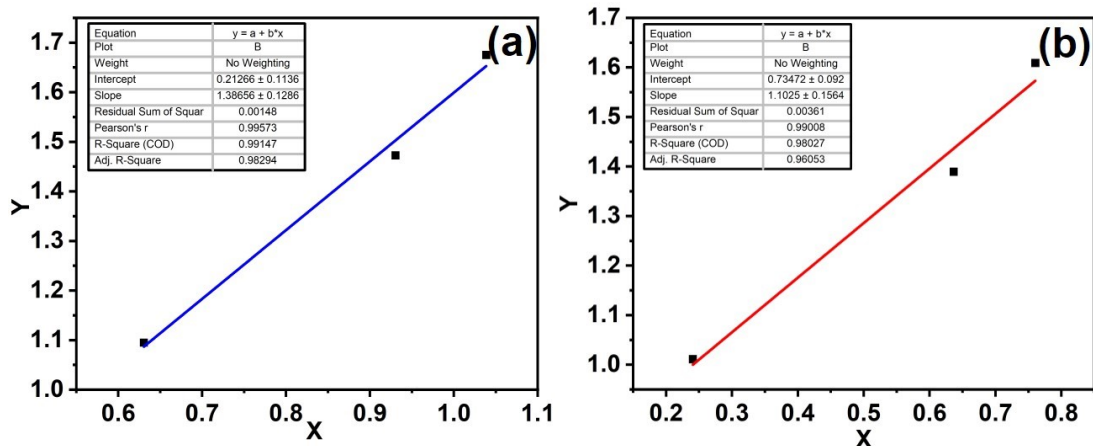

Fig. S13 The fitting process of Foygel model for (a) E-G/PVA and (b) E-G@C-P3HT/PVA.

Table S1.  $k_0$  and  $\tau$  in Foygel model for E-G/PVA and E-G@C-P3HT/PVA.

| Sample         | $k_0(\text{W m}^{-1} \text{K}^{-1})$ | $\tau$ |
|----------------|--------------------------------------|--------|
| E-G/PVA        | 1.62                                 | 1.39   |
| E-G@C-P3HT/PVA | 5.37                                 | 1.10   |

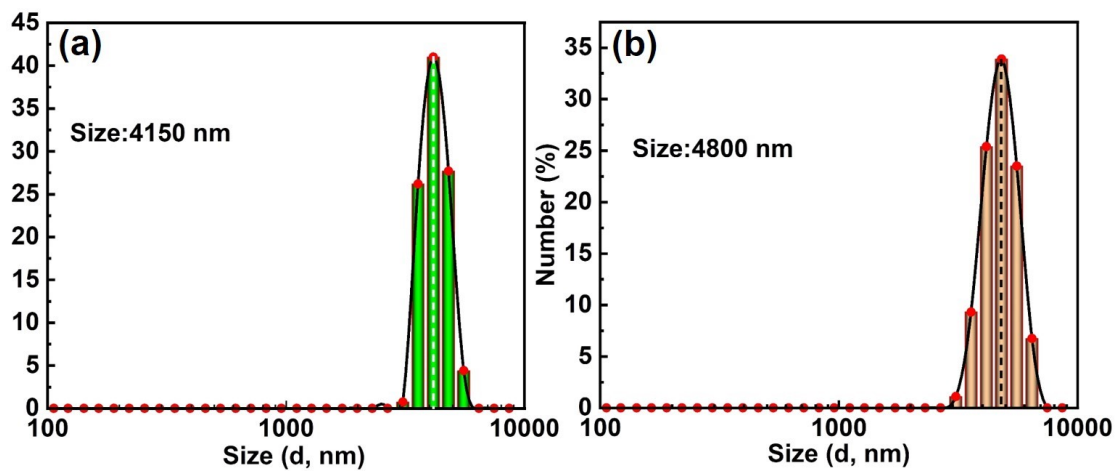

**Fig. S14** The distribution of sheet size of E-G and E-G@C-P3HT obtained by dynamic light scattering, respectively.



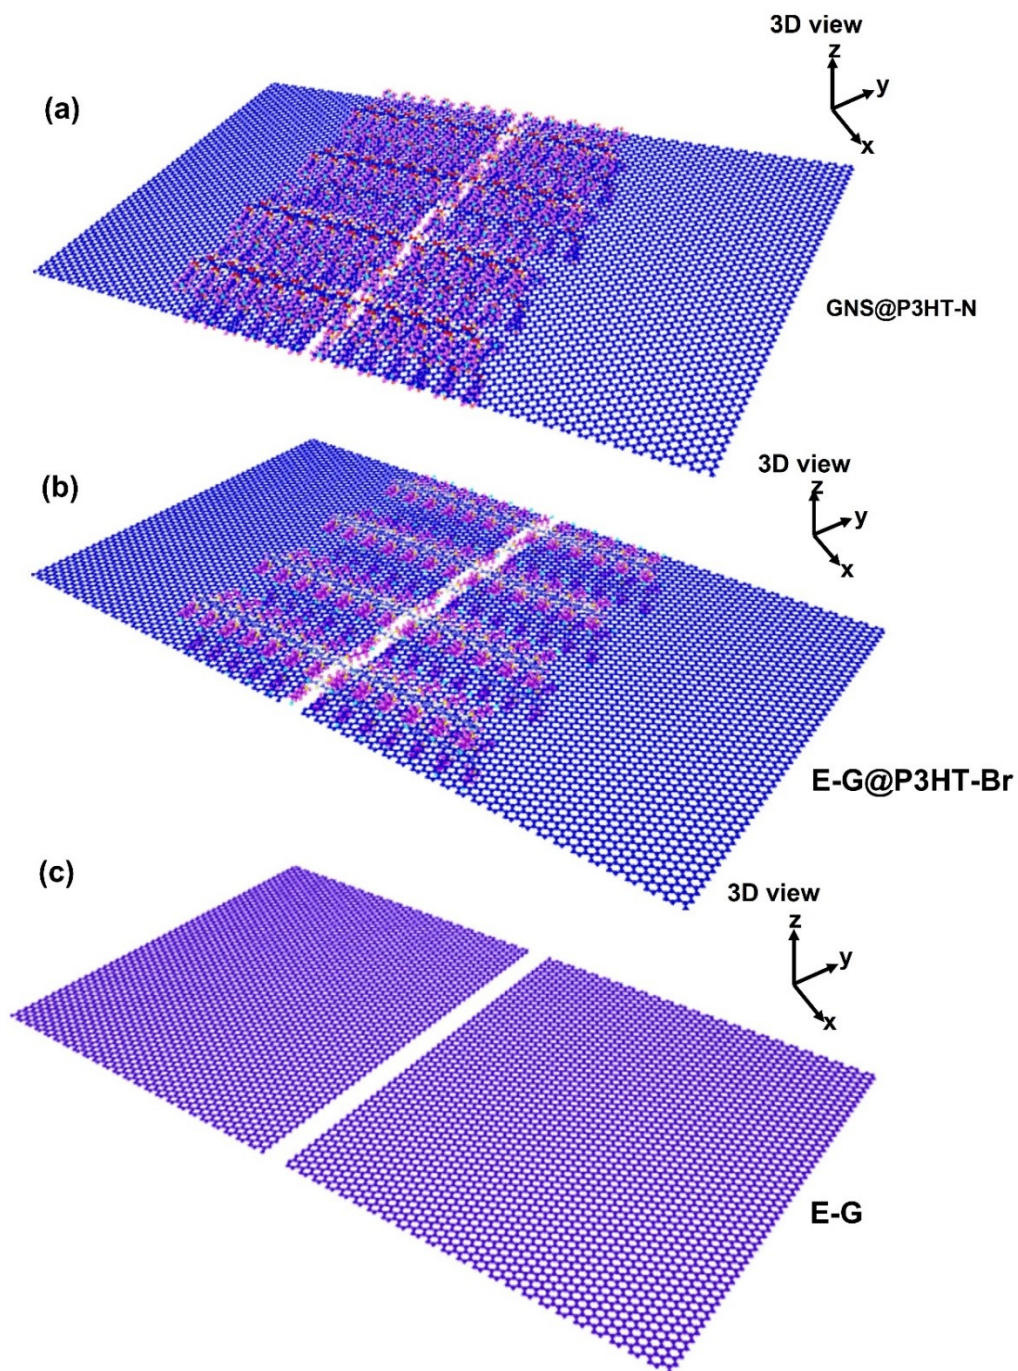

**Fig. S15** Simulation modeling of E-G@C-P3HT, E-G@ P3HT-Br, and E-G, respectively.

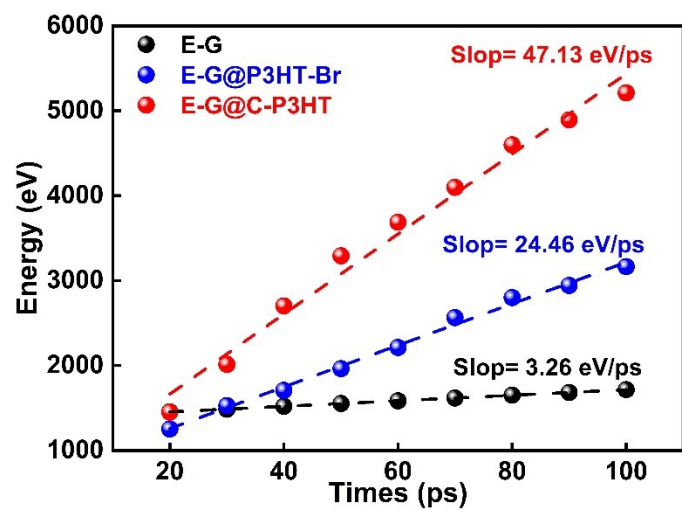

**Fig. S16** Accumulated thermal energy as a function of the time in steady state for E-G@C-P3HT, E-G@ P3HT-Br, and E-G.

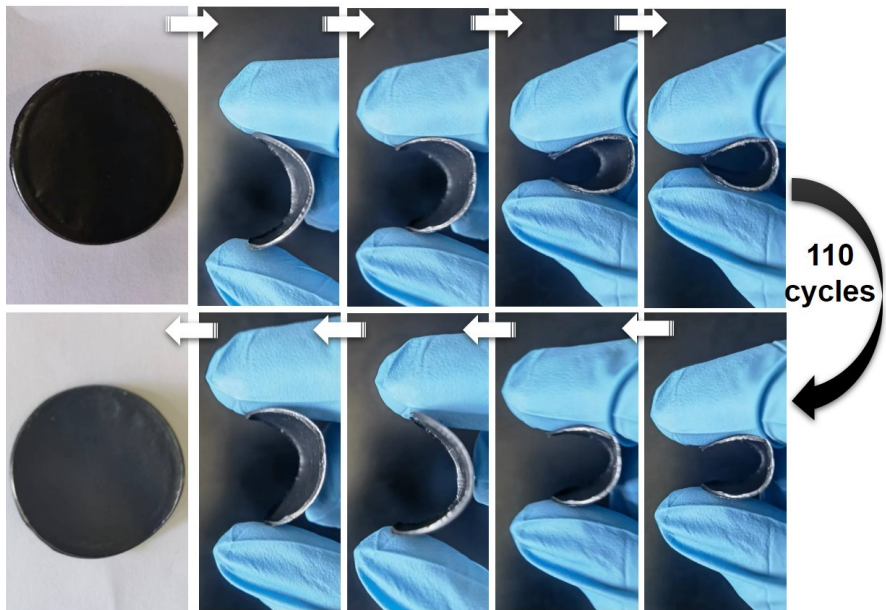

**Fig. S17** corresponding variations of morphology as functions of bending cycles.

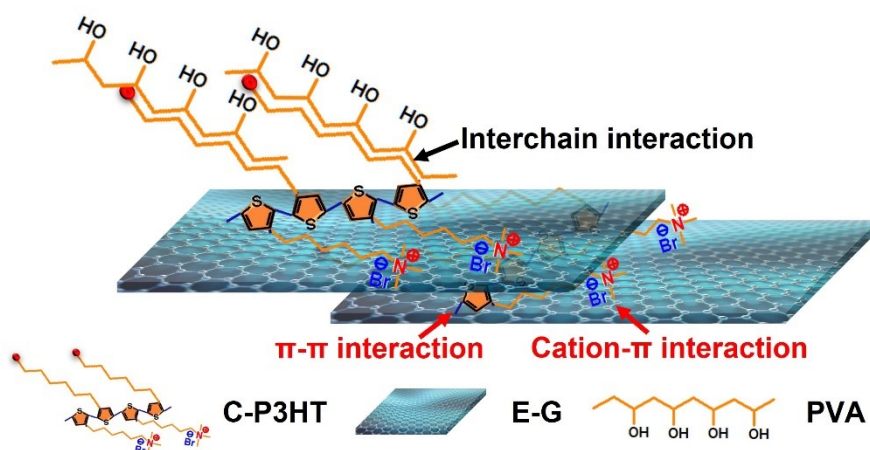

**Fig. 18** Schematic illustration of non-covalent bonding interaction between E-G layers and between E-G and PVA by C-P3HT modification.

#### Reference

1. Y. Yao, J. Sun, X. Zeng, R. Sun, J. B. Xu and C. P. Wong, *Small*, 2018, **14**, 1704044.
2. Z. G. Wang, M. Z. Chen, Y. H. Liu, H. J. Duan, L. Xu, L. Zhou, J. Z. Xu, J. Lei and Z. M. Li, *J. Mater. Chem. C*, 2019, **7**, 9018-9024.
3. Y. Zhang, C. Lei, K. Wu and Q. Fu, *Adv. Sci.*, 2021, **8**, 2004821.
